# Supplementary material for: The Enhancement of Intestinal Immunity in Offspring Piglets by Maternal Probiotic or Synbiotic Supplementation Is Associated With the Alteration of Gut Microbiota
Source: PubMed Central journal article supplement (PMC8298840; doi:10.3389/fnut.2021.686053), 2021-07-09
Supplement: Data_Sheet_1.pdf [file Data_Sheet_1.pdf]

## Supplementary Material

**Table S1: Composition and nutrient levels of the sows' basal diets (air-dry basis; %)**

| Items                               | Pregnant sows' diet | Lactating sows' diet |
|-------------------------------------|---------------------|----------------------|
| Ingredients                         |                     |                      |
| Corn                                | 37.50               | 66.00                |
| Soybean meal                        | 9.50                | 25.00                |
| Wheat bran                          | 14.00               | 5.00                 |
| Barley                              | 25.00               |                      |
| Soybean hull                        | 10.00               |                      |
| Pregnant sows' premix <sup>1</sup>  | 4.00                |                      |
| Lactating sows' premix <sup>2</sup> |                     | 4.00                 |
| Total                               | 100.00              | 100.00               |
| Nutrient levels <sup>3</sup>        |                     |                      |
| Digestible energy (MJ/Kg)           | 12.55               | 13.87                |
| Crude protein                       | 13.18               | 16.61                |
| Crude fiber                         | 4.64                | 2.80                 |
| SID Lys                             | 0.48                | 0.75                 |
| SID Met+ Cys                        | 0.43                | 0.51                 |
| SID Thr                             | 0.37                | 0.53                 |
| SID Trp                             | 0.13                | 0.17                 |
| Calcium                             | 0.59                | 0.63                 |
| Phosphorus                          | 0.43                | 0.51                 |

**Note:** <sup>1</sup>Pregnant sows' premix provided the following per kg of diets: CaHPO<sub>4</sub>·2H<sub>2</sub>O 10 g, NaCl 4 g, CuSO<sub>4</sub>·5H<sub>2</sub>O 80 mg, FeSO<sub>4</sub>·H<sub>2</sub>O 360 mg, ZnSO<sub>4</sub>·H<sub>2</sub>O 240 mg, MnSO<sub>4</sub>·H<sub>2</sub>O 100 mg, MgSO<sub>4</sub>·7H<sub>2</sub>O 1 g, 1% ICl 50 mg, 1% Na<sub>2</sub>SeO<sub>3</sub> 36 mg, 1% CoCl<sub>2</sub> 16 mg, NaHCO<sub>3</sub> 1.4 g, VA 10 000 IU, VD<sub>3</sub> 1 800 IU, VE 20 mg, VK<sub>3</sub> 2.4 mg, VB<sub>1</sub> 1.6 mg, VB<sub>2</sub> 6 mg, VB<sub>6</sub> 1.6 mg, VB<sub>12</sub> 0.024 mg, folic acid 1.2 mg, nicotinamide 20 mg, pantothenic acid 12 mg, biotin 0.12 mg, ferrous glycinate 100 mg, choline chloride 1g, phytase 200 mg, fruity 80 mg, limestone 12 g.

<sup>2</sup>Lactating sows' premix provided the following per kg of the diet: CaHPO<sub>4</sub>·2H<sub>2</sub>O 10 g, NaCl 4 g, CuSO<sub>4</sub>·5H<sub>2</sub>O 80 mg, FeSO<sub>4</sub>·H<sub>2</sub>O 360 mg, ZnSO<sub>4</sub>·H<sub>2</sub>O 240 mg, MnSO<sub>4</sub>·H<sub>2</sub>O 100 mg, 1% ICl 50 mg, 1% Na<sub>2</sub>SeO<sub>3</sub> 36 mg, 1% CoCl<sub>2</sub> 16 mg, NaHCO<sub>3</sub> 1.4 g, VA 10 000 IU, VD<sub>3</sub> 1 800 IU, VE 20 mg, VK<sub>3</sub> 2.4 mg, VB<sub>1</sub> 1.6 mg, VB<sub>2</sub> 6 mg, VB<sub>6</sub> 1.6 mg, VB<sub>12</sub> 0.024 mg, folic acid 1.2 mg,

nicotinamide 20 mg, pantothenic acid 12 mg, biotin 0.12 mg, Lysine 1.5 g, ferrous glycinate 100 mg, choline chloride 1g, phytase 200 mg, fruity 80 mg, limestone 12 g.

<sup>3</sup> Energy and amino acids is a calculated value, while the others are measured values. Calculated nutrient levels using values for feed ingredients from the NRC (2012). SID, standard ileum digestible.

**Table S2: Composition and nutrient levels of the basal diet for weaned piglets**

| Items                         | Prophase nursery diet (35-65 days of age) |
|-------------------------------|-------------------------------------------|
| Ingredients (%)               |                                           |
| Corn                          | 54.92                                     |
| Soybean meal                  | 22.00                                     |
| Wheat bran                    | 10.13                                     |
| Rice bran                     | 8.95                                      |
| Premix <sup>1)</sup>          | 4.00                                      |
| Total                         | 100.00                                    |
| Nutrient levels <sup>2)</sup> |                                           |
| DE/(MJ/kg)                    | 13.50                                     |
| CP                            | 15.65                                     |
| Ca                            | 0.46                                      |
| TP                            | 0.51                                      |
| Thr                           | 0.79                                      |
| Ser                           | 0.72                                      |
| Met                           | 0.31                                      |
| Ile                           | 0.68                                      |
| Leu                           | 1.40                                      |
| Lys                           | 1.36                                      |

Note: <sup>1)</sup>Premix provided the following per kilogram of diets: enzymic preparation 1.2 g, VA 26 000 IU, VD<sub>3</sub> 10 000 IU, VE 70 IU, VK<sub>3</sub> 10 mg, VB<sub>1</sub> 10 mg, VB<sub>2</sub> 25 mg, VB<sub>6</sub> 10 mg, VB<sub>12</sub> 0.075 mg, biotin 0.4 mg, folic acid 5 mg, nicotinamide 100 mg, pantothenic 50 mg, choline 1 600 mg, flavoring agent 500 mg, edulcorant 300 mg, acidulating agent 5 g, Cu (as CuSO<sub>4</sub>·5H<sub>2</sub>O) 230 mg, Mn (as MnSO<sub>4</sub>·H<sub>2</sub>O) 97 mg, Zn (as ZnSO<sub>4</sub>·H<sub>2</sub>O) 218 mg, Fe (as FeSO<sub>4</sub>·H<sub>2</sub>O) 165 mg, I (as Ca(IO<sub>3</sub>)<sub>2</sub>) 0.3 mg, Se (as Na<sub>2</sub>SeO<sub>3</sub>) 0.3 mg, Co (as CoSO<sub>4</sub>·xH<sub>2</sub>O) 0.4 mg, glucose 2.1 g, antioxidants 0.4 g, antimildew agent 1 g, Ca (as CaHPO<sub>4</sub> and CaCO<sub>3</sub>) 3.42 g, P (as CaHPO<sub>4</sub>) 1.155 g.

<sup>2)</sup> Energy is a calculated value, while the others are measured values.

**Table S3:** The concentrations of short-chain fatty acids (SCFAs) in jejunum and ileum of piglets ( $n = 6$ ,  $\mu\text{g/g}$ )

| Items          | Control group | Antibiotic group | Probiotic group | Synbiotic group | SEM   | <i>P</i> -values |
|----------------|---------------|------------------|-----------------|-----------------|-------|------------------|
| <b>Jejunum</b> |               |                  |                 |                 |       |                  |
| Acetate        | 137.39        | 112.80           | 107.73          | 123.85          | 13.16 | 0.878            |
| Butyrate       | 38.44         | 51.66            | 47.28           | 39.27           | 5.06  | 0.778            |
| <b>Ileum</b>   |               |                  |                 |                 |       |                  |
| Acetate        | 487.96        | 582.69           | 501.99          | 736.08          | 55.41 | 0.405            |
| Butyrate       | 43.89         | 89.50            | 63.13           | 37.94           | 8.17  | 0.083            |

Data are means  $\pm$  SEM. Differences were considered significant at ( $P < 0.05$ ).
